# Supplementary material for: Radiotherapy versus no radiotherapy for rectal neuroendocrine carcinoma patients treated with surgery and chemotherapy: a population-based cohort study
Source: Research Square preprint supplement (doi:10.21203/rs.3.rs-6095565/v1), 2025-03-04
Supplement: Supplementary file 1 [file b045abe5cd7466f4f0e30239.docx]

| **Table 1** TheGeneral Characteristics of Rectal NECs | | | | | | | | |
| --- | --- | --- | --- | --- | --- | --- | --- | --- |
|  | **Before matching** | | | **After matching** | | | | |
| **Items** | **non-RT group (n=312),**  **n (%)** | **RT group (n=354), n (%)** | **P value** | **non-RT (n=291), n (%)** | | **RT group (n=291), n (%)** | | **P value** |
| **Year of diagnosis** |  |  | 0.258 |  | |  | | 0.514 |
| After 2009 | 168(53.8) | 194(54.8) |  | 158(54.3) | | 166(57.0) | |  |
| 2003-2008 | 89(28.5) | 113 (31.9) |  | 83(28.5) | | 85(29.2) | |  |
| Before 2002 | 55(17.6) | 47(13.3) |  | 50(17.2) | | 40(13.7) | |  |
| **Gender** |  |  | 0.646 |  | |  | | 0.617 |
| Male | 173(55.4) | 190(53.7) |  | 157(54.0) | | 163(56.0) | |  |
| Female | 139(44.6) | 164 (44.3) |  | 134(46.0) | | 128 (44.0) | |  |
| **Age at diagnosis** |  |  | 0.408 |  | |  | | 0.219 |
| <=45 | 52(16.7) | 46(13.0) |  | 51(17.5) | | 40(13.1) | |  |
| 46-60 | 112(35.9) | 134(37.9) |  | 97(33.3) | | 115(39.5) | |  |
| >=61 | 148(47.4) | 174(49.2) |  | 143(49.1) | | 136(46.7) | |  |
| **Race** |  |  | 0.497 |  | |  | | 0.267 |
| White | 249(79.8) | 269(76.0) |  | 234(80.4) | | 221(75.9) | |  |
| Black | 32(10.3) | 43(12.1) |  | 26(8.9) | | 38(13.1) | |  |
| Other | 31(9.9) | 42(11.9) |  | 31(10.7) | | 32(11.0) | |  |
| **Clinical stage** |  |  | 0.018 |  | |  | | 1.000 |
| Ⅰ | 34(10.9) | 54(15.3) |  | 34(11.7) | | 34(11.7) | |  |
| Ⅱ | 35(11.2) | 59(16.7) |  | 35(12.0) | | 35(12.0) | |  |
| Ⅲ | 142(45.5) | 161(45.5) |  | 142(48.8) | | 142(48.8) | |  |
| Ⅳ | 101(32.4) | 80(22.6) |  | 80(27.5) | | 80(27.5) | |  |
| **T stage** |  |  | 0.110 |  | |  | | 0.117 |
| T1/2 | 92(29.5) | 85 (24.0) |  | 90(30.9) | | 73(25.1) | |  |
| T3/4 | 220(70.5) | 269(76.0) |  | 201(69.1) | | 218(74.9) | |  |
| **N stage** |  |  | 0.678 |  | |  | | 0.854 |
| N0 | 108(34.6) | 128(36.2) |  | 82(36.1) | | 84(28.9) | |  |
| N1/2 | 204(65.4) | 226(63.8) |  | 209(63.9) | | 207(71.1) | |  |
| **M stage** |  |  | 0.016 |  | |  | | 1.000 |
| M0 | 211(67.6) | 274(77.4) |  | 211(72.5) | | 211(72.5) | |  |
| M1 | 101(32.4) | 80(22.6) |  | 80(27.5) | | 80(27.5) | |  |
| **Tumor site** |  |  | 0.058 |  | |  | | 0.197 |
| Rectum | 235(75.3) | 288(81.4) |  | 219(75.3) | | 232(83.2) | |  |
| Rectosigmoid junction | 77(24.7) | 66 (18.6) |  | 72(24.7) | | 59(16.8) | |  |
| **Histologic type** |  |  | 0.211 |  | |  | | 0.168 |
| Small cell | 91(29.2) | 84 (23.7) |  | 82(28.2) | | 68 (23.4) | |  |
| Large cell | 29(9.3) | 42(11.9) |  | 26(8.9) | | 38(13.1) | |  |
| NOS | 192(61.5) | 228(64.4) |  | 183(62.9) | | 185(63.6) | |  |
| **Chemotherapy sequence** | |  | 0.420 |  | |  | | 0.711 |
| After surgery | 193(61.9) | 202(57.1) |  | 177(60.8) | | 168(58.1) | |  |
| Before surgery | 94(30.1) | 123 (34.7) |  | 90(29.2) | | 99 (34.0) | |  |
| Both before and after surgery | 25(8.0) | 29(8.2) |  | 24(8.2) | | 23(7.9) | |  |
| **Type of surgery** |  |  | 0.491 |  | |  | | 0.411 |
| Local resection | 81(26.0) | 85(24.0) |  | 74(25.4) | | 72(24.7) | |  |
| Radical resection | 219(70.2) | 238(67.2) |  | 206(70.8) | | 201(69.1) | |  |
| Extensional resection | 12(3.8) | 20(5.6) |  | 11(3.8) | | 18(6.2) | |  |
| **Abbreviation** NEC; neuroendocrine carcinoma; RT: radiation therapy | | | |  |  | |  | |  |

| **Table 2** Univariable and Multivariable COX Regression Analyses of Rectal NECs for OS | | | | | | | | |
| --- | --- | --- | --- | --- | --- | --- | --- | --- |
|  | **Before Matching** | | | | **After Matching** | | | |
| **Characteristics** | **Univariable** | | **Multivariable** | | **Univariable** | | **Multivariable** |  |
| HR (95%CI) | *P* | HR (95%CI) | *P* | HR (95%CI) | *P* | HR (95%CI) | *P* |
| **Year of diagnosis** |  |  |  |  |  |  | N/A |  |
| After 2009 | 1 |  |  |  | 1 |  |  |  |
| 2003-2008 | 1.09(0.84-1.43) | 0.518 |  |  | 1.11(0.85-1.47) | 0.533 |  |  |
| Before 2002 | 1.87(1.35-2.58) | 0.371 |  |  | 1.96(1.44-2.72) | 0.302 |  |  |
| **Sex** |  |  | N/A |  |  |  | N/A |  |
| Male | 1 |  |  |  | 1 |  |  |  |
| Female | 0.856(0.72-1.02） | 0.079 |  |  | 0.88（0.74-1.06） | 0.183 |  |  |
| **Age** |  |  | N/A |  |  |  | N/A |  |
| ≤45 | 1 |  |  |  | 1 |  |  |  |
| 46-60 | 0.86(0.66-1.12) | 0.256 |  |  | 0.84(0.63-1.00) | 0.202 |  |  |
| >61 | 1.02(0.79-1.31) | 0.892 |  |  | 1.11(0.85-1.44) | 0.442 |  |  |
| **Race** |  | 0.495 | N/A |  |  |  | N/A |  |
| White | 1 |  |  |  | 1 |  |  |  |
| Black | 1.09(0.84-1.43) | 0.514 |  |  | 0.83(0.61-1.13) | 0.241 |  |  |
| Others | 0.88(0.66-1.17) | 0.369 |  |  | 1.24(0.87-1.77) | 0.227 |  |  |
| **T stage** |  |  |  |  |  |  |  |  |
| T1/2 | 1 |  | 1 |  | 1 |  | 1 |  |
| T3/4 | 1.34(1.06-1.70) | 0.016 | 1.23(0.93-1.64) | 0.429 | 1.67(1.34-2.09) | <0.001 | 1.26(0.94-1.70) | 0.127 |
| **N stage** |  |  |  |  |  |  |  | 0.345 |
| N0 | 1 |  | 1 |  | 1 |  | 1 |  |
| N1/2 | 1.35(1.12-1.63) | 0.011 | 1.32(1.06-1.70) | 0.375 | 1.16(0.95-1.41) | 0.158 | 1.50(1.00-2.25) | 0.048 |
| **M stage** |  |  |  |  |  |  | 0.84(0.57-1.23) | <0.001 |
| M0 | 1 |  | 1 |  | 1 |  | 1 |  |
| M1 | 3.14(2.60-3.79) | <0.001 | 3.01(2.48-3.64) | <0.001 | 2.84(2.328-3.46) | <0.001 | 3.86(2.45-6.07) | <0.001 |
| **Tumor location** |  |  | N/A |  |  |  | N/A |  |
| Rectum | 1 |  |  |  | 1 |  |  |  |
| Rectosigmoid junction | 1.03(0.82-1.28) | 0.828 |  |  | 1.03(0.821-1.28) | 0.828 |  |  |
| **Histologic type** |  |  | N/A |  |  |  | N/A |  |
| Large cells | 1 |  |  |  | 1 |  |  |  |
| Small cells | 1.02(0.75-1.40) | 0.897 |  |  | 1.01(0.73-1.41) | 0.937 |  |  |
| NOS | 0.82(0.613-1.09) | 0.174 |  |  | 0.78(0.58-1.06) | 0.106 |  |  |
| **Chemotherapy sequence** |  |  | N/A |  |  |  | N/A |  |
| After surgery | 1 |  |  |  | 1 |  |  |  |
| Before surgery | 1.21(1.00-1.46) | 0.099 |  |  | 1.21(0.98-1.48) | 0.071 |  |  |
| Both before and after surgery | 1.24 (0.89-1.72) | 0.051 |  |  | 0.97 (0.68-1.38) | 0.868 |  |  |
| **Surgery type** |  |  | N/A |  |  |  | N/A |  |
| Local resection | 1 |  |  |  | 1 |  |  |  |
| Radical resection | 0.81(0.67-0.98) | 0.33 |  |  | 0.85(0.69-1.04) | 0.121 |  |  |
| Extensional resection | 0.94(0.62-1.44) | 0.780 |  |  | 0.85(0.52-1.39) | 0.522 |  |  |
| **Radiation** |  |  |  |  |  |  |  |  |
| No | 1 |  | 1 |  | 1 |  | 1 |  |
| Yes | 0.50(0.45-0.65) | <0.001 | 0.54(0.45-0.65) | <0.001 | 0.69(0.58-0.83) | <0.001 | 0.55(0.45-0.67) | <0.001 |
| **Abbreviations** N/A: not applicable; CI; confidence interval; HR: hazard ratio; NEC: neuroendocrine carcinoma; OS: overall survival | | | | | | | | |

| **Table 3** Subgroup OS Analyses of Rectal NECs by Clinical Stages | | | | | |
| --- | --- | --- | --- | --- | --- |
| **Before Matching** | | | | | |
|  | No. | non-RT group | RT group | HR (95%CI) | *P* |
| Ⅰ | 88 | 88.0 | 171.0 | 1.08(0.60-1.97) | 0.4161 |
| Ⅱ | 94 | 10.0 | 36.0 | 0.29(0.16-0.52) | <0.001 |
| Ⅲ | 303 | 12.0 | 23.0 | 0.73(0.56-0.95) | 0.0160 |
| Ⅳ | 181 | 8.0 | 7.0 | 0.63(0.47-0.85) | 0.0010 |
| **After Matching** | | | | | |
|  | No. | non-RT group | RT group | HR (95%CI) | *P* |
| Ⅰ | 68 | 88.0 | 171.0 | 1.00(0.51-1.96) | 0.6679 |
| Ⅱ | 70 | 10.0 | 24.0 | 0.36(0.21-0.63) | <0.001 |
| Ⅲ | 284 | 18.0 | 22.0 | 0.75(0.57-0.98) | 0.0315 |
| Ⅳ | 160 | 8.0 | 7.0 | 0.69(0.50-0.95) | 0.0118 |
| **Abbreviation** CI; confidence interval; HR: hazard ratio; NEC: neuroendocrine carcinoma; OS: overall survival; RT: radiation therapy | | | | | |

| **Table 4** Subgroup OS Analyses of Rectal NECs by Radiotherapy and Surgery Sequences | | | | | |
| --- | --- | --- | --- | --- | --- |
|  | No. | Pre-operative RT | Post-operative RT | HR (95%CI) | *P* |
| Before matching | 354 | 22.0 | 22.0 | 0.93(0.72-1.2) | 0.5730 |
| After matching | 291 | 18.0 | 21.0 | 0.98(0.75-1.30) | 0.9123 |
| **Abbreviation** CI; confidence interval; HR: hazard ratio; NEC: neuroendocrine carcinoma; OS: overall survival; RT: radiation therapy | | | | | |
